# Supplementary material for: An Observational Study from Long-Term AAV Re-administration in Two Hemophilia Dogs
Source: PubMed Central journal article supplement — Mol Ther Methods Clin Dev. 2018 Aug 4;10:257–67. doi: 10.1016/j.omtm.2018.07.011 (PMC6104583; doi:10.1016/j.omtm.2018.07.011), 2018-08-04
Supplement: mmc1.pdf [file mmc1.pdf]

**OMTM, Volume 10**

**Supplemental Information**

**An Observational Study from Long-Term AAV**

**Re-administration in Two Hemophilia Dogs**

**Junjiang Sun, Wenwei Shao, Xiaojing Chen, Elizabeth P. Merricks, Lauren Wimsey, Yasmina L. Abajas, Glenn P. Niemeyer, Clinton D. Lothrop, Paul E. Monahan, R. Jude Samulski, Timothy C. Nichols, and Chengwen Li**

Supplementary Figure 1

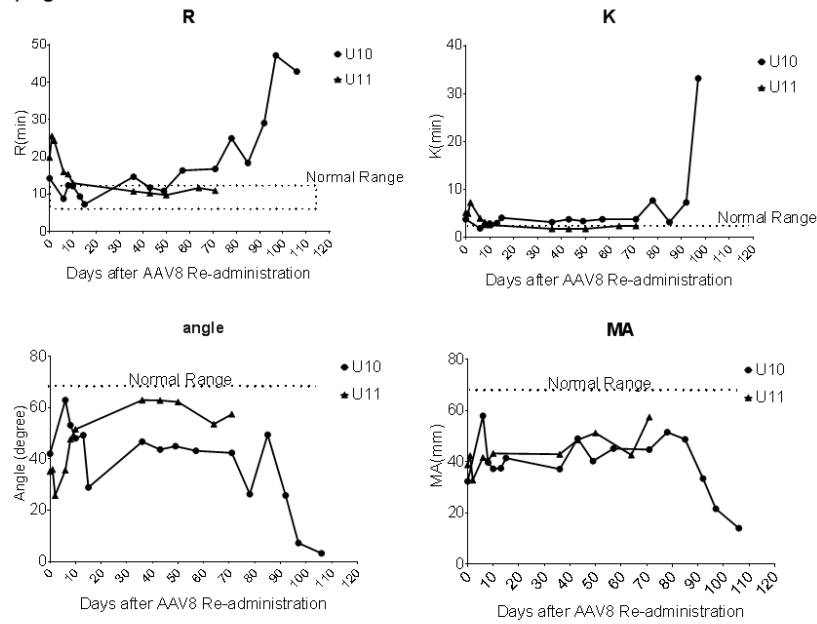

**Supplemental Figure 1. Thromboelastography analysis after AAV8/hFVIII re-administration.**

Thromboelastometry analysis was performed at the defined time points after AAV8/hFVIII re-administration in hemophilia dogs U10 and U11. **(A)** Reaction time in minutes, **(B)** Kinetics time in minutes, **(C)**  $\alpha$  angle in degree, and **(D)** maximum clot firmness in mm. Dashed lines represented the normal range of each parameter.

Supplementary Figure 2

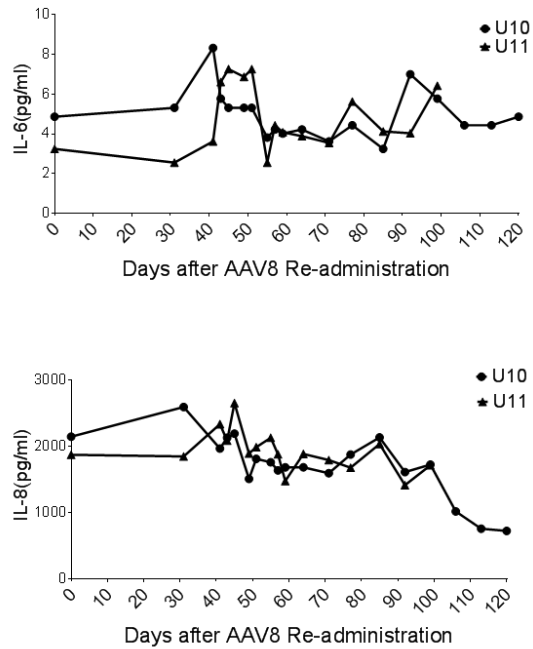

**Supplemental Figure 2. The change of other cytokines IL-6, IL-8 after AAV8/hFVIII re-administration**

Dynamic changes of cytokines **IL-6 (A)**, **IL-8 (B)** were examined on the Luminex MAGPIX system from the plasma of the hemophilia dogs U10 and U11 after AAV8/hFVIII re-administration. Cytokines, IL-2, IL-18 and TNF- $\alpha$  were undetectable in most of the time points in both dogs U10 and U11.

Supplementary Figure 3

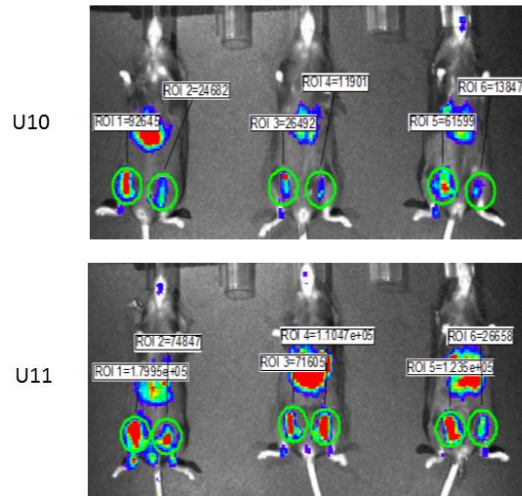

Supplementary Figure 3. Mouse imaging for luciferase expression

| Dog | Weight(kg) | Time       | ALK      |           | SGPT(U/L) | SGOT(U/L) | Tot         |           | Urea   | Creat(mg/dL) |            | Total   | Alb(d/dL) | Glu(mg/dL) | Chol(mg/dL) | Ca+(mg/dL) | P(mg/dL) | Na+(mEq/L) | K+(mEq/L) | Chl(mEq/L) | Alb/ Glob | Glob(g/dL) | PSL(U/L) | Triglyc(mg/dL) | GGTP(U/L)    |            |
|-----|------------|------------|----------|-----------|-----------|-----------|-------------|-----------|--------|--------------|------------|---------|-----------|------------|-------------|------------|----------|------------|-----------|------------|-----------|------------|----------|----------------|--------------|------------|
|     |            |            | CPK(U/L) | PHOS(U/L) |           |           | Bili(mg/mL) | Amyl(U/L) |        | N(mg/dL)     | BUN/ Creat |         |           |            |             |            |          |            |           |            |           |            |          |                | Protein(g/L) | Mg+(mEq/L) |
|     |            |            | 59-895   | 5-131     | 12-118    | 15-66     | 0.1-0.3     | 290-1125  | 6.0-25 | 0.5-1.6      | 4.0-27     | 5.0-7.4 | 2.7-4.4   | 70-136     | 92-324      | 8.9-11.4   | 2.5-6.0  | 139-154    | 3.6-5.5   | 102-120    | 0.8-2.0   | 1.6-3.6    | 24-140   | 29-291         | 1.0-12       | 1.5-2.5    |
| U10 | 23.7       | Baseline 1 | 101      | 30        | 46        | 33        | 0.1         | 669       | 14     | 0.8          | 18         | 5.6     | 2.9       | 96         | 241         | 9.5        | 3.7      | 144        | 4.3       | 111        | 1.1       | 2.7        | 52       | 59             | 1            | 1.7        |
|     |            | Day 0      | 128      | 44        | 50        | 42        | 0.1         | 767       | 18     | 1.1          | 16         | 5.7     | 3         | 111        | 295         | 9.3        | 3.1      | 148        | 4.3       | 115        | 1.1       | 2.7        | 58       | 55             | 1            | 1.9        |
|     |            | 4hr post-  | 128      | 43        | 49        | 37        | 0.1         | 721       | 15     | 1.1          | 14         | 5.1     | 2.8       | 94         | 269         | 9.2        | 3.8      | 149        | 4.6       | 116        | 1.2       | 2.3        | 51       | 42             | 2            | 1.5        |
|     |            | 78         | 102      | 47        | 36        | 34        | 0.1         | 572       | 17     | 1.1          | 15         | 6.4     | 3.1       | 108        | 330 H       | 9.6        | 2.6      | 150        | 4.1       | 110        | 0.9       | 3.3        | 41       | 56             | 3            | 1.7        |
|     |            | 85         | 84       | 46        | 34        | 34        | 0.1         | 498       | 16     | 1            | 16         | 5.9     | 2.9       | 92         | 348 H       | 8.6 L      | 3.1      | 145        | 4.2       | 112        | 1         | 3          | 56       | 63             | 3            | 1.6        |
|     |            | 92         | 58 L     | 44        | 34        | 30        | 0.1         | 483       | 13     | 1            | 13         | 5.8     | 2.9       | 90         | 344 H       | 8.4 L      | 2.9      | 148        | 4.2       | 114        | 1         | 2.9        | 53       | 47             | 3            | 1.6        |
|     |            | 99         | 108      | 47        | 34        | 32        | 0.1         | 459       | 16     | 1.2          | 13         | 5.9     | 3.9       | 106        | 397 H       | 8.6 L      | 3        | 151        | 4.3       | 116        | 1         | 3          | 58       | 47             | 3            | 1.7        |
| U11 | 24.6       | baseline   | 100      | 26        | 20        | 28        | 0.1         | 607       | 20     | 1.1          | 18         | 5.9     | 3.2       | 98         | 315         | 9          | 4.1      | 150        | 4.6       | 114        | 1.2       | 2.7        | 189 H    | 70             | 3            | 1.6        |
|     |            | Day 0      | 95       | 30        | 25        | 26        | 0.1         | 605       | 14     | 0.8          | 18         | 5.9     | 3.2       | 106        | 314         | 9.5        | 2.9      | 147        | 4.1       | 113        | 1.2       | 2.7        | 92       | 47             | 4            | 1.6        |
|     |            | 4hr post-  | 98       | 27        | 25        | 26        | 0.1         | 570       | 14     | 0.9          | 16         | 5.7     | 3.1       | 114        | 302         | 9.6        | 3.7      | 149        | 4.4       | 115        | 1.2       | 2.6        | 85       | 57             | 4            | 1.6        |
|     |            | day 1      | 90       | 30        | 23        | 26        | 0.1         | 464       | 10     | 0.8          | 13         | 5.8     | 3.1       | 101        | 311         | 9.5        | 3.4      | 150        | 4.2       | 116        | 1.1       | 2.7        | 95       | 43             | 3            | 1.5        |

Supplemental Datasheet for Biochemistry parameters for U10 and U11
